# Supplementary material
Source: ML conference proceedings conference paper supplement (https://openaccess.thecvf.com/content/WACV2022/html/OBrien_Network_Generalization_Prediction_WACV_2022_paper.html)
Supplement: Supplementary file 1 [file OBrien_Network_Generalization_Prediction_WACV_2022_supplemental.pdf]

## A. Comparing $\Delta I$ and $I$

We propose  $\Delta I(L, C^{s_1}, \dots, C^{s_K})$  to approximate the Interaction Information between  $K$  context features and the network loss  $L$ ,  $I(L, C^{s_1}, \dots, C^{s_K})$ . The computational complexity of computing  $\Delta I(L, C^{s_1}, \dots, C^{s_K})$  grows linearly with  $K$ , as compared to the computational complexity of computing  $I(L, C^{s_1}, \dots, C^{s_K})$  which grows combinatorially with  $K$ . We investigate the difference between  $I(L, C^{s_1}, \dots, C^{s_K})$  and  $\Delta I(L, C^{s_1}, \dots, C^{s_K})$ . To simplify the notation, we denote  $C^{s_1}$  as  $C^1$  and  $C^{s_2}$  as  $C^2$ . It is trivial to compute the Mutual Information between the context features and  $L$  and select  $C^1$  to be the feature most informative about the loss. We assume  $C^1$  has been selected and we compare  $I(L, C^1, C^2)$  and  $\Delta I(L, C^1, C^2)$ .

$$I(L, C^1, C^2) = I(L, C^2) - I(L, C^2|C^1) \quad (11)$$

$$\Delta I(L, C^1, C^2) = I(L, C^2) - I(C^1, C^2) \quad (12)$$

The difference between  $I(L, C^1, C^2)$  and  $\Delta I(L, C^1, C^2)$  is:

$$I(L, C^1, C^2) - \Delta I(L, C^1, C^2) = I(C^1, C^2) - I(L, C^2|C^1) \quad (13)$$

As we would like the context features in  $\mathbf{C}^{S_K}$  to be roughly independent, let us assume that  $C^1$  is not informative of  $C^2$ , i.e.,  $I(C^1, C^2) = 0$ .

$$I(L, C^1, C^2) - \Delta I(L, C^1, C^2) = -I(L, C^2|C^1) \quad (14)$$

The reader is reminded that the conditional mutual information is computed as:

$$I(L, C^2|C^1) = \sum_{\ell \in L} \sum_{c_1 \in C^1} \sum_{c_2 \in C^2} p(\ell, c_1, c_2) \times \log \left( \frac{p(c_1)p(\ell, c_1, c_2)}{p(\ell, c_1)p(c_1, c_2)} \right) \quad (15)$$

For simplicity, let us consider the point wise conditional mutual information at  $\ell$ ,  $c_1$ , and  $c_2$ :

$$\log \left( \frac{p(c_1)p(\ell, c_1, c_2)}{p(\ell, c_1)p(c_1, c_2)} \right) \quad (16)$$

Recall, it was assumed that  $C^1$  and  $C^2$  are independent, thus  $p(c_1, c_2) = p(c_1)p(c_2)$ . The joint probability  $p(\ell, c_1, c_2)$  can also be factored as  $\frac{1}{Z}\psi(\ell, c_1)\psi(\ell, c_2)$ .

$$= \log \left( \frac{p(c_1)\psi(\ell, c_1)\psi(\ell, c_2)}{Zp(\ell, c_1)p(c_1)p(c_2)} \right) \quad (17)$$

$$= \log \left( \frac{\psi(\ell, c_1)\psi(\ell, c_2)}{Zp(\ell, c_1)p(c_2)} \right) \quad (18)$$

Note  $\psi(\ell, c_1) \propto p(\ell, c_1)$  and  $\psi(\ell, c_2) \propto p(\ell, c_2)$ . Thus, the difference between the proposed  $\Delta I$  and the Interaction Information is proportional to

$$\propto \log(p(\ell|c_2)) \quad (19)$$

If we consider only combinations of  $\ell$  and  $c_2$  that exist in the test set,  $p(\ell|c_2) > 0$ . As the new context feature becomes more informative,  $p(\ell|c_2) \rightarrow 1$  and the difference  $\log(p(\ell|c_2)) \rightarrow 0$ . This demonstrates that, if the context features are informative about the loss,  $\Delta I$  is a good approximation of the Interaction Information.
